# Supplementary material
Source: Springer Nature journal article supplement (https://www.springermedizin.de/resource/supplementary/40164_2013_52_MOESM5_ESM.pdf/9687078)

a

Percentage of T-ALL blasts death

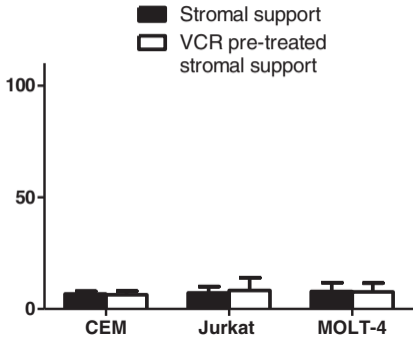

b

Percentage of T-ALL blasts death

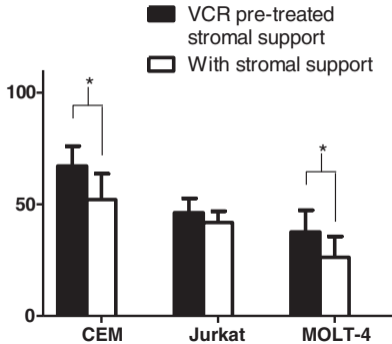

Supplement: MOESM5 [file 9687078]
